# Supplementary material for: Genomic Evidence for a Globally Distributed, Bimodal Population in the Ovine Footrot Pathogen Dichelobacter nodosus
Source: PubMed Central journal article supplement — mBio. 2014 Sep 30;5(5):e01821-14. doi: 10.1128/mBio.01821-14 (PMC4196234; doi:10.1128/mbio.01821-14), 2014-09-30
Supplement: mbo005142008st1.pdf [file mbo005142008st1.pdf]

## SUPPLEMENTAL MATERIAL

**Supplemental Table S1:** Summary of SNPs present in the intact AprV2/B2 genes found in the 103 isolates in the study.

| Base in the VCS1703A genome |          | Alternate | Base in protein coding region of | Amino acid in protein coding region of | Amino acid in mature AprV2/B2 protein | Position of SNP in codon | Difference in encoded amino acid | Summary of the distribution of the alternate sequence* |
|-----------------------------|----------|-----------|----------------------------------|----------------------------------------|---------------------------------------|--------------------------|----------------------------------|--------------------------------------------------------|
| sequence                    | VCS1703A |           | DNO_1167                         | DNO_1167                               |                                       |                          |                                  |                                                        |
| 1216759                     | C        | T         | 144                              | 48                                     | -                                     | 3                        | synonymous                       | 15 isolates, All AprB2-type                            |
| 1216525                     | T        | C         | 378                              | 126                                    | -                                     | 3                        | synonymous                       | 17 isolates, All AprB2-type                            |
| 1216495                     | C        | T         | 408                              | 136                                    | 7                                     | 3                        | synonymous                       | 2 isolates, All AprV2-type                             |
| 1216490                     | G        | A         | 413                              | 138                                    | 9                                     | 2                        | R→H                              | 2 isolates, All AprB2-type                             |
| 1216373                     | G        | A         | 530                              | 177                                    | 48                                    | 2                        | R→Q                              | 1 isolate, AprB2-type                                  |
| 1216356                     | G        | A         | 547                              | 183                                    | 54                                    | 1                        | V→I                              | 3 isolates, 2 AprB2-type, 1 AprV2-type                 |
| 1216303                     | T        | C         | 600                              | 200                                    | 71                                    | 3                        | synonymous                       | 12 isolates, All AprB2-type                            |
| 1216242                     | T        | C         | 661                              | 221                                    | 92                                    | 1                        | Y→R                              | 37 isolates, All AprB2-type                            |
| 1216241                     | A        | G         | 662                              | 221                                    | 92                                    | 2                        | Y→R                              | 37 isolates, All AprB2-type                            |
| 1216165                     | C        | T         | 738                              | 246                                    | 117                                   | 3                        | synonymous                       | 6 isolates, All AprB2-type                             |
| 1216159                     | C        | T         | 744                              | 248                                    | 119                                   | 3                        | synonymous                       | 6 isolates, All AprB2-type                             |
| 1215922                     | T        | C         | 981                              | 327                                    | 198                                   | 3                        | synonymous                       | 36 isolates, All AprB2-type                            |
| 1215916                     | G        | A         | 987                              | 329                                    | 200                                   | 3                        | synonymous                       | 36 isolates, All AprB2-type                            |
| 1215751                     | G        | A         | 1152                             | 384                                    | 255                                   | 3                        | synonymous                       | 25 isolates, All AprB2-type                            |
| 1215670                     | C        | T         | 1233                             | 411                                    | 282                                   | 3                        | synonymous                       | 3 isolates, All AprB2-type                             |
| 1215456                     | A        | G         | 1447                             | 483                                    | 354                                   | 1                        | N→D                              | 36 isolates, All AprB2-type                            |
| 1215421                     | T        | C         | 1482                             | 494                                    | 365                                   | 3                        | synonymous                       | 36 isolates, All AprB2-type                            |
| 1215391                     | T        | C         | 1512                             | 504                                    | 375                                   | 3                        | synonymous                       | 34 isolates, All AprB2-type                            |
| 1215389                     | G        | A         | 1514                             | 505                                    | 376                                   | 2                        | R→H                              | 10 isolates, All AprB2-type                            |
| 1215346                     | A        | C         | 1557                             | 519                                    | 390                                   | 3                        | synonymous                       | 34 isolates, All AprB2-type                            |
| 1215340                     | C        | T         | 1563                             | 521                                    | 392                                   | 3                        | synonymous                       | 1 isolate, AprB2-type                                  |
| 1215333                     | A        | G         | 1570                             | 524                                    | 395                                   | 1                        | I→V                              | 36 isolates, All AprB2-type                            |
| 1215316                     | C        | T         | 1587                             | 529                                    | 400                                   | 3                        | synonymous                       | 36 isolates, All AprB2-type                            |
| 1215303                     | A        | G         | 1600                             | 534                                    | 405                                   | 1                        | N→D                              | 36 isolates, All AprB2-type                            |
| 1215235                     | C        | T         | 1668                             | 556                                    | 427                                   | 3                        | synonymous                       | 3 isolates, All AprB2-type                             |
| 1215175                     | C        | T         | 1728                             | 576                                    | 447                                   | 3                        | synonymous                       | 2 isolates, All AprB2-type                             |
| 1215124                     | T        | C         | 1779                             | 593                                    | 464                                   | 3                        | synonymous                       | 7 isolates, All AprB2-type                             |
| 1215100                     | G        | A         | 1803                             | 601                                    | 472                                   | 3                        | synonymous                       | 7 isolates, All AprB2-type                             |

\*100 isolates included in the alignment. Isolates JIR1204 (full deletion of DNO\_1167), 09-5148-1a (20 base tandem repeat at base 125 of the protein coding region, GAAGTGTGCGCTTTATCGTC, frameshift) and 11BKT068051 (insertion of a single base after base 414 of the protein coding region, frameshift) were excluded from the SNP analysis. 37 isolates were AprB2-type, 63 isolates were AprV2-type.
