# Supplementary material for: Genomic Evidence for a Globally Distributed, Bimodal Population in the Ovine Footrot Pathogen Dichelobacter nodosus
Source: PubMed Central journal article supplement — mBio. 2014 Sep 30;5(5):e01821-14. doi: 10.1128/mBio.01821-14 (PMC4196234; doi:10.1128/mbio.01821-14), 2014-09-30
Supplement: mbo005142008st2.pdf [file mbo005142008st2.pdf]

**Supplemental Table S2.** Genes containing SNPs that correlate best (top 1%) with the Clade I/Clade II division

| Gene <sup>a</sup> | Variable positions <sup>b</sup> | Coding region (bases) | Top 1% SNPs <sup>c</sup> | SNPs causing amino acid change | Putative Gene Product                                          |
|-------------------|---------------------------------|-----------------------|--------------------------|--------------------------------|----------------------------------------------------------------|
| DNO_0033          | 44                              | 741                   | 4                        | 3                              | extracellular solute-binding family protein                    |
| DNO_0246*         | 76                              | 2504                  | 2                        | 0                              | leucyl-tRNA synthetase                                         |
| DNO_0249          | 21                              | 777                   | 1                        | 1                              | hypothetical protein                                           |
| DNO_0297          | 88                              | 1755                  | 51                       | 34                             | hypothetical protein                                           |
| DNO_0298          | 12                              | 756                   | 2                        | 1                              | uroporphyrinogen-III synthase family protein HemD              |
| DNO_0299          | 18                              | 918                   | 3                        | 1                              | porphobilinogen deaminase                                      |
| DNO_0307          | 12                              | 621                   | 6                        | 0                              | ribonuclease T                                                 |
| DNO_0309*         | 25                              | 1164                  | 6                        | 1                              | N-acetylglucosamine-6-phosphate deacetylase                    |
| DNO_0311          | 85                              | 1455                  | 10                       | 5                              | N-acetylmuramoyl-L-alanine amidase                             |
| DNO_0330*         | 117                             | 1842                  | 5                        | 0                              | competence family protein                                      |
| DNO_0421          | 27                              | 1344                  | 1                        | 0                              | acetyl-CoA carboxylase; biotin carboxylase                     |
| DNO_0423          | 32                              | 957                   | 1                        | 0                              | dihydrouridine synthase                                        |
| DNO_0426          | 21                              | 1290                  | 5                        | 0                              | hypothetical protein                                           |
| DNO_0530          | 157                             | 1620                  | 3                        | 1                              | sulfatase                                                      |
| DNO_0534          | 7                               | 456                   | 2                        | 1                              | OstA-like family protein                                       |
| DNO_0538          | 21                              | 696                   | 1                        | 0                              | ubiquinone biosynthesis O-methyltransferase                    |
| DNO_0605          | 23                              | 1812                  | 6                        | 2                              | basic extracellular subtilisin-like protease BprV              |
| DNO_0619          | 58                              | 1371                  | 9                        | 2                              | L-serine dehydratase                                           |
| DNO_0620*         | 15                              | 192                   | 4                        | 1                              | ABC iron transporter permease                                  |
| DNO_0622          | 90                              | 3909                  | 1                        | 1                              | ATP-dependent helicase HrpA                                    |
| DNO_0688          | 86                              | 3528                  | 1                        | 0                              | DNA polymerase III subunit alpha                               |
| DNO_0798          | 17                              | 1035                  | 1                        | 1                              | isopentenyl pyrophosphate isomerase                            |
| DNO_0817*         | 13                              | 816                   | 4                        | 1                              | 2,3,4,5-tetrahydropyridine-2-carboxylate N-succinyltransferase |

|           |    |      |    |    |                                                                                  |
|-----------|----|------|----|----|----------------------------------------------------------------------------------|
| DNO_0818* | 17 | 474  | 3  | 1  | GTP cyclohydrolase I                                                             |
| DNO_0819* | 48 | 1236 | 7  | 3  | two-component phosphate sensor PhoR                                              |
| DNO_0820* | 19 | 675  | 7  | 3  | hypothetical membrane protein                                                    |
| DNO_0822  | 15 | 1206 | 2  | 0  | response regulator receiver domain-containing protein                            |
| DNO_0823* | 31 | 1197 | 6  | 0  | phosphopantothenoylcysteine<br>decarboxylase/phosphopantothenate-cysteine ligase |
| DNO_0825  | 9  | 564  | 1  | 0  | co-chaperone GrpE                                                                |
| DNO_0869  | 57 | 2208 | 10 | 1  | two-component sensor kinase                                                      |
| DNO_0870  | 51 | 732  | 3  | 0  | glycosyl transferase family protein                                              |
| DNO_0871  | 34 | 1185 | 1  | 1  | macrolide-specific ABC-type efflux protein                                       |
| DNO_0872  | 30 | 1935 | 4  | 1  | macrolide-specific ABC-type efflux carrier protein                               |
| DNO_0874  | 23 | 1401 | 8  | 0  | aspartate ammonia-lyase                                                          |
| DNO_0899  | 29 | 1128 | 1  | 0  | D-alanyl-D-alanine carboxypeptidase                                              |
| DNO_0917  | 22 | 777  | 2  | 0  | exodeoxyribonuclease III                                                         |
| DNO_0929  | 13 | 834  | 1  | 1  | pyridoxal kinase                                                                 |
| DNO_0930  | 57 | 1779 | 6  | 4  | hypothetical protein                                                             |
| DNO_0979  | 27 | 933  | 1  | 1  | D-alanine-D-alanine ligase                                                       |
| DNO_1015  | 15 | 675  | 1  | 0  | hypothetical protein                                                             |
| DNO_1031  | 37 | 1008 | 3  | 1  | heptosyl transferase I                                                           |
| DNO_1034* | 80 | 1998 | 37 | 10 | carboxyl-terminal protease family protein                                        |
| DNO_1047  | 49 | 2082 | 4  | 3  | polynucleotide phosphorylase/polyadenylase                                       |
| DNO_1070  | 6  | 369  | 1  | 0  | glycine cleavage system protein H                                                |
| DNO_1071  | 19 | 537  | 1  | 0  | adenylate kinase                                                                 |
| DNO_1135  | 23 | 819  | 1  | 0  | formamidopyrimidine-DNA glycosylase                                              |
| DNO_1165  | 93 | 3597 | 3  | 1  | exonuclease V; beta subunit                                                      |
| DNO_1166  | 1  | 357  | 1  | 0  | hypothetical protein                                                             |
| DNO_1167* | 29 | 1806 | 11 | 5  | acidic extracellular subtilisin-like protease AprV2                              |
| DNO_1191  | 75 | 3141 | 1  | 1  | mutidrug efflux protein                                                          |

|                    |      |      |    |   |                                             |
|--------------------|------|------|----|---|---------------------------------------------|
| DNO_1200           | 26   | 1455 | 1  | 1 | pyruvate kinase                             |
| DNO_1202           | 25   | 585  | 12 | 3 | N-acetyl-anhydromuranmyl-L-alanine amidase  |
| DNO_1203*          | 18   | 867  | 10 | 2 | hypothetical protein                        |
| DNO_1217           | 50   | 1539 | 1  | 1 | glutamate--cysteine ligase                  |
| DNO_1340           | 4    | 288  | 1  | 0 | co-chaperonin GroES                         |
| DNO_1343           | 31   | 750  | 12 | 9 | extracellular solute-binding protein        |
| DNO_1344           | 21   | 645  | 3  | 2 | phosphoglycerate mutase family protein      |
| DNO_1345           | 12   | 738  | 1  | 0 | extracellular solute-binding family protein |
| Non-coding regions | 1156 |      | 15 | - |                                             |

<sup>a</sup> Locus tag from the VCS1703A genome annotation.

<sup>b</sup> Positions where at least one of the 101 isolates has a SNP

<sup>c</sup> SNPs were sorted using Plink in an order that ranged from exactly matching the Clade I/Clade II division through to most unrelated. The top 1% of SNPs that exactly matched and nearly matched were used for the top 1% SNP set

\* indicates genes included in Table 2
