# Supplementary material for: Genomic Evidence for a Globally Distributed, Bimodal Population in the Ovine Footrot Pathogen Dichelobacter nodosus
Source: PubMed Central journal article supplement — mBio. 2014 Sep 30;5(5):e01821-14. doi: 10.1128/mBio.01821-14 (PMC4196234; doi:10.1128/mbio.01821-14), 2014-09-30
Supplement: mbo005142008st3.pdf [file mbo005142008st3.pdf]

**Supplemental Table S3.** Genes associated with each of the variable regions

| Region | Locus tag <sup>a</sup> | Coordinates in genome <sup>a</sup> |        | Gene symbol | Product                                                                  |
|--------|------------------------|------------------------------------|--------|-------------|--------------------------------------------------------------------------|
| VRL    | DNO_0173               | 181552                             | 184944 | <i>vrlS</i> | DEAD-DEAH box helicase domain protein                                    |
| VRL    | DNO_0174               | 184934                             | 185782 | <i>vrlR</i> | hypothetical protein                                                     |
| VRL    | DNO_0175               | 185801                             | 186556 | <i>vrlQ</i> | conserved hypothetical protein VrlQ                                      |
| VRL    | DNO_0176               | 186556                             | 188556 | <i>vrlP</i> | conserved hypothetical protein VrlP                                      |
| VRL    | DNO_0177               | 188553                             | 191450 | <i>vrlO</i> | DEAD helicase domain protein VrlO                                        |
| VRL    | DNO_0178               | 191454                             | 191552 | <i>vrlN</i> | hypothetical protein VrlN                                                |
| VRL    | DNO_0179               | 191549                             | 193036 | <i>vrlM</i> | hypothetical protein VrlM                                                |
| VRL    | DNO_0180               | 193039                             | 195828 | <i>vrlL</i> | S-adenosyl-L-methionine-dependent methyltransferases family protein VrlL |
| VRL    | DNO_0181               | 195920                             | 199651 | <i>vrlK</i> | conserved hypothetical protein VrlK                                      |
| VRL    | DNO_0182               | 199648                             | 200163 | <i>vrlJ</i> | conserved hypothetical protein VrlJ                                      |
| VRL    | DNO_0183               | 200173                             | 200376 | <i>vrlI</i> | conserved hypothetical protein VrlI                                      |
| VRL    | DNO_0184               | 200503                             | 201060 | <i>vrlH</i> | conserved hypothetical protein VrlH                                      |
| VRL    | DNO_0185               | 201057                             | 201854 | <i>vrlG</i> | glutamine amidotransferase domain protein VrlG                           |
| VRL    | DNO_0186               | 201839                             | 202360 | <i>vrlF</i> | conserved hypothetical protein VrlF                                      |
| VRL    | DNO_0187               | 202372                             | 203328 | <i>vrlE</i> | conserved hypothetical protein VrlE                                      |
| VRL    | DNO_0188               | 203574                             | 203832 | <i>vrlD</i> | conserved hypothetical protein VrlD                                      |
| VRL    | DNO_0189               | 203845                             | 206472 | <i>vrlC</i> | conserved hypothetical protein VrlC                                      |
| VRL    | DNO_0190               | 206539                             | 206998 | <i>vrlB</i> | hypothetical protein VrlB                                                |
| VRL    | DNO_0191               | 207395                             | 207039 | <i>vrlA</i> | hypothetical protein VrlA                                                |
| HsdS   | DNO_0220               | 235942                             | 239040 | <i>hsdR</i> | type I site-specific deoxyribonuclease                                   |
| HsdS   | DNO_0221               | 239033                             | 239476 |             | conserved hypothetical protein                                           |
| HsdS   | DNO_0222               | 239473                             | 240711 | <i>hsdS</i> | type I restriction modification DNA specificity domain protein           |
| HsdS   | DNO_0223               | 240702                             | 243182 | <i>hsdM</i> | type I restriction-modification system, M subunit                        |
| RTX    | DNO_0334               | 366740                             | 358452 |             | potential RTX family protein                                             |

|               |          |        |        |              |                                         |
|---------------|----------|--------|--------|--------------|-----------------------------------------|
| OMP1          | DNO_0382 | 423496 | 421655 | <i>omp1B</i> | outer membrane protein 1B               |
| OMP1          | DNO_0383 | 423569 | 425506 | <i>omp1E</i> | outer membrane protein 1E               |
| OMP1          | DNO_0384 | 427914 | 425776 | <i>omp1D</i> | outer membrane protein 1D               |
| OMP1          | DNO_0385 | 427989 | 429788 | <i>omp1A</i> | outer membrane protein 1A               |
| PGR           | DNO_0690 | 741913 | 745275 |              | PGR                                     |
| Bacteriophage | DNO_0738 | 788795 | 788697 |              | hypothetical protein                    |
| Bacteriophage | DNO_0739 | 789692 | 788865 |              | conserved hypothetical membrane protein |
| Bacteriophage | DNO_0740 | 789960 | 789685 |              | hypothetical protein                    |
| Bacteriophage | DNO_0741 | 790168 | 789863 |              | hypothetical protein                    |
| Bacteriophage | DNO_0742 | 790956 | 790165 |              | hypothetical protein                    |
| Bacteriophage | DNO_0743 | 792208 | 790934 |              | phage terminase, large subunit          |
| Bacteriophage | DNO_0744 | 793098 | 792205 |              | conserved hypothetical protein          |
| Bacteriophage | DNO_0744 | 793662 | 793135 |              | hypothetical protein                    |
| Bacteriophage | DNO_0745 | 795158 | 793659 |              | phage virion morphogenesis-like protein |
| Bacteriophage | DNO_0746 | 796067 | 795669 |              | hypothetical protein                    |
| Bacteriophage | DNO_0747 | 796899 | 796078 |              | hypothetical protein                    |
| Bacteriophage | DNO_0748 | 797888 | 796902 |              | conserved hypothetical protein          |
| Bacteriophage | DNO_0749 | 798377 | 797910 |              | conserved hypothetical protein          |
| Bacteriophage | DNO_0750 | 798799 | 798374 |              | phage virion morphogenesis-like protein |
| Bacteriophage | DNO_0751 | 799247 | 798780 |              | hypothetical protein                    |
| Bacteriophage | DNO_0752 | 800011 | 799244 |              | conserved hypothetical protein          |
| Bacteriophage | DNO_0753 | 800241 | 800014 |              | hypothetical protein                    |
| Bacteriophage | DNO_0754 | 800458 | 800249 |              | hypothetical protein                    |
| Bacteriophage | DNO_0755 | 804466 | 800495 |              | phage tail tape measure family protein  |
| Bacteriophage | DNO_0756 | 804867 | 804463 |              | conserved hypothetical protein          |
| Bacteriophage | DNO_0757 | 808505 | 804876 |              | conserved hypothetical protein          |
| Bacteriophage | DNO_0758 | 809373 | 808507 |              | conserved hypothetical protein          |
| Bacteriophage | DNO_0759 | 809710 | 809285 |              | hypothetical protein                    |

|               |          |        |        |              |                                              |
|---------------|----------|--------|--------|--------------|----------------------------------------------|
| Bacteriophage | DNO_0760 | 811383 | 809707 |              | conserved hypothetical protein               |
| Bacteriophage | DNO_0761 | 811619 | 811392 |              | hypothetical protein                         |
| Bacteriophage | DNO_0762 | 812055 | 812618 |              | hypothetical protein                         |
| Bacteriophage | DNO_0763 | 812666 | 814279 |              | helicase family protein                      |
| Bacteriophage | DNO_0764 | 814328 | 815422 |              | hypothetical protein                         |
| Bacteriophage | DNO_0765 | 815574 | 816242 |              | hypothetical protein                         |
| Bacteriophage | DNO_0766 | 816363 | 816617 |              | hypothetical protein                         |
| Bacteriophage | DNO_0767 | 816635 | 817090 | <i>ssb-2</i> | single-strand binding protein                |
| Bacteriophage | DNO_0768 | 817103 | 817960 |              | conserved hypothetical protein               |
| Bacteriophage | DNO_0769 | 817957 | 818562 |              | bacteriophage recombination function protein |
| Bacteriophage | DNO_0770 | 818588 | 818920 |              | hypothetical protein                         |
| Bacteriophage | DNO_0771 | 818920 | 819207 |              | hypothetical protein                         |
| Bacteriophage | DNO_0772 | 819315 | 820748 |              | conserved hypothetical protein               |
| Bacteriophage | DNO_0773 | 820877 | 821794 | <i>regA2</i> | regulatory protein RegA2                     |
| Bacteriophage | DNO_0774 | 822459 | 822196 |              | hypothetical protein                         |
| Bacteriophage | DNO_0775 | 823347 | 822460 |              | conserved hypothetical protein               |
| Bacteriophage | DNO_0776 | 824116 | 823352 | <i>dnaC</i>  | DNA replication protein DnaC                 |
| Bacteriophage | DNO_0778 | 825878 | 824363 |              | hypothetical protein                         |
| Bacteriophage | DNO_0780 | 826611 | 826234 |              | endodeoxyribonuclease RusA family            |
| Bacteriophage | DNO_0781 | 826961 | 826605 |              | hypothetical protein                         |
| Bacteriophage | DNO_0782 | 827212 | 826961 |              | conserved hypothetical protein               |
| Bacteriophage | DNO_0783 | 827603 | 827196 |              | hypothetical protein                         |
| Bacteriophage | DNO_0784 | 828101 | 829300 |              | bacteriophage P4-like integrase              |
| Vap1          | DNO_0262 | 286641 | 286751 |              | hypothetical protein                         |
| Vap1          | DNO_0263 | 286748 | 287446 | <i>regA1</i> | regulatory protein RegA1                     |
| Vap1          | DNO_0265 | 289759 | 290040 | <i>vapD2</i> | virulence-associated protein VapD2           |
| Vap1          | DNO_0266 | 290906 | 292216 | <i>vapE2</i> | virulence-associated protein VapE2           |
| Vap1          | DNO_0267 | 292206 | 292553 | <i>vapF</i>  | virulence-associated protein VapF            |

|      |          |         |         |              |                                                        |
|------|----------|---------|---------|--------------|--------------------------------------------------------|
| Vap1 | DNO_0268 | 292517  | 292386  |              | hypothetical protein                                   |
| Vap1 | DNO_0269 | 292557  | 292778  | <i>vapG2</i> | virulence-associated protein VapG2                     |
| Vap1 | DNO_0270 | 293468  | 293728  |              | hypothetical protein                                   |
| Vap1 | DNO_0271 | 293475  | 293128  | <i>vapA2</i> | virulence-associated protein VapA2                     |
| Vap1 | DNO_0272 | 293791  | 294117  | <i>vapI</i>  | virulence-associated protein VapI                      |
| Vap1 | DNO_0273 | 294127  | 294402  |              | plasmid maintenance system killer family protein       |
| Vap1 | DNO_0274 | 295660  | 295301  | <i>toxA1</i> | plasmid maintenance system killer family protein ToxA1 |
| Vap1 | DNO_0275 | 295981  | 295673  | <i>vapA1</i> | virulence-associated protein VapA1                     |
| Vap1 | DNO_0276 | 296547  | 296317  | <i>vapB1</i> | virulence-associated protein VapB1                     |
| Vap1 | DNO_0277 | 296951  | 296544  | <i>vapC1</i> | virulence-associated protein VapC1                     |
| Vap1 | DNO_0278 | 297073  | 297354  | <i>vapD1</i> | virulence-associated protein VapD1                     |
| Vap1 | DNO_0279 | 297992  | 299305  | <i>vapE1</i> | virulence-associated protein VapE1                     |
| Vap1 | DNO_0280 | 299401  | 299607  | <i>vapG1</i> | virulence-associated protein VapG1                     |
| Vap1 | DNO_0281 | 299586  | 299891  | <i>vapH</i>  | virulence-associated protein VapH                      |
| Vap1 | DNO_0282 | 299986  | 301191  | <i>intA1</i> | integrase A1                                           |
| Vap2 | DNO_1038 | 1074787 | 1075281 | <i>intB2</i> | integrase B2                                           |
| Vap2 | DNO_1039 | 1076208 | 1075849 | <i>toxA2</i> | plasmid maintenance system killer family protein ToxA2 |
| Vap2 | DNO_1040 | 1076529 | 1076221 | <i>vapA3</i> | virulence-associated protein VapA3                     |
| Vap2 | DNO_1041 | 1077095 | 1076865 | <i>vapB2</i> | virulence-associated protein VapB2                     |
| Vap2 | DNO_1042 | 1077499 | 1077092 | <i>vapC2</i> | virulence-associated protein VapC2                     |
| Vap2 | DNO_1043 | 1079043 | 1080356 | <i>vapE3</i> | virulence-associated protein VapE3                     |
| Vap2 | DNO_1044 | 1080452 | 1080673 | <i>vapG3</i> | virulence-associated protein VapG3                     |
| Vap2 | DNO_1045 | 1081068 | 1082273 | <i>intA2</i> | integrase A2                                           |

<sup>a</sup>Accession number: NC\_009446 for *D. nodosus* strain VCS1703A
