# Supplementary material for: Genomic Evidence for a Globally Distributed, Bimodal Population in the Ovine Footrot Pathogen Dichelobacter nodosus
Source: PubMed Central journal article supplement — mBio. 2014 Sep 30;5(5):e01821-14. doi: 10.1128/mBio.01821-14 (PMC4196234; doi:10.1128/mbio.01821-14), 2014-09-30
Supplement: mbo005142008st4.pdf [file mbo005142008st4.pdf]

**Supplemental Table S4. Fimbrial biogenesis genes**

| <b>Gene symbol</b>       | <b>Locus Tag<sup>c</sup></b> |
|--------------------------|------------------------------|
| <i>fimB</i> <sup>a</sup> | DNO_0109                     |
| <i>fimA</i>              | DNO_0110                     |
| <i>fimX</i>              | DNO_0238                     |
| <i>pilM</i>              | DNO_0344                     |
| <i>pilN</i>              | DNO_0345                     |
| <i>pilO</i>              | DNO_0346                     |
| <i>pilP</i>              | DNO_0347                     |
| <i>pilQ</i>              | DNO_0348                     |
| <i>pilS</i>              | DNO_0434                     |
| <i>pilR</i>              | DNO_0435                     |
| <i>pilF</i>              | DNO_0515                     |
| <i>rpoN</i>              | DNO_0532                     |
| <i>pilT</i>              | DNO_0675                     |
| <i>pilU</i>              | DNO_0676                     |
| <i>fimV</i>              | DNO_0712                     |
| <i>pilE</i>              | DNO_0890                     |
| <i>fimU</i>              | DNO_0891                     |
| <i>pilX</i>              | DNO_0892                     |
| <i>pilW</i>              | DNO_0893                     |
| <i>pilV</i>              | DNO_0894                     |
| <i>pilC</i>              | DNO_0895                     |
| <i>chpA</i>              | DNO_1093                     |
| <i>pilJ</i>              | DNO_1094                     |
| <i>pilI</i>              | DNO_1095                     |
| <i>pilH</i>              | DNO_1096                     |
| <i>pilG</i>              | DNO_1097                     |
| <i>ppk</i>               | DNO_1106                     |
| <i>fimP</i>              | DNO_1124                     |
| <i>fimO</i>              | DNO_1125                     |
| <i>fimN</i>              | DNO_1126                     |
| <i>pilZ</i>              | DNO_1215                     |
| <i>fimZ</i> <sup>b</sup> | -                            |
| <i>est</i> <sup>b</sup>  | -                            |
| <i>trbP</i> <sup>b</sup> | -                            |

<sup>a</sup>not present in serogroup D and H isolates

<sup>b</sup>replaces *fimB* in serogroup D and H isolates, <sup>c</sup>Accession number: NC\_009446 for *D. nodosus* strain VCS1703A
