# Supplementary material for: Genomic Evidence for a Globally Distributed, Bimodal Population in the Ovine Footrot Pathogen Dichelobacter nodosus
Source: PubMed Central journal article supplement — mBio. 2014 Sep 30;5(5):e01821-14. doi: 10.1128/mBio.01821-14 (PMC4196234; doi:10.1128/mbio.01821-14), 2014-09-30
Supplement: mbo005142008st5.pdf [file mbo005142008st5.pdf]

**Supplemental Table S5.** Details of individual isolates

| Isolate     | Year | Host  | Country   | Region            | Location    | <sup>a</sup> Isolate collection | Clade | Serogroup (by sequence) | AprV2/B2 type | Presumptive disease phenotype | Justification for allocation of presumptive disease phenotype |
|-------------|------|-------|-----------|-------------------|-------------|---------------------------------|-------|-------------------------|---------------|-------------------------------|---------------------------------------------------------------|
| CS287       | 1977 | Sheep | Australia | Victoria          |             | Monash Univ.                    | 2     | G                       | R             | Unknown                       | -                                                             |
| CS310       | 1978 | Sheep | Australia | New South Wales   |             | Monash Univ.                    | 2     | G                       | R             | Unknown                       | -                                                             |
| CS311       | 1978 | Sheep | Australia | New South Wales   |             | Monash Univ.                    | 2     | B                       | R             | Unknown                       | -                                                             |
| JIR1204     | -    | Sheep | Australia | New South Wales   |             | Monash Univ.                    | 2     | I                       | -             | Unknown                       | -                                                             |
| VCS1001     | 1974 | Sheep | Australia | New South Wales   | Yass        | Monash Univ.                    | 1     | A                       | Y             | Virulent                      | Disease state - severe footrot                                |
| HA322       | -    | Sheep | Australia | Victoria          | Hamilton    | Monash Univ.                    | 1     | F                       | Y             | Virulent                      |                                                               |
| AC3466      | 1991 | Sheep | Australia | Western Australia |             | Monash Univ.                    | 1     | B                       | Y             | Unknown                       | -                                                             |
| AC3486      | 1991 | Sheep | Australia | Western Australia |             | Monash Univ.                    | 1     | E                       | Y             | Unknown                       | -                                                             |
| AC3488      | 1991 | Sheep | Australia | Western Australia |             | Monash Univ.                    | 2     | E                       | R             | Unknown                       | -                                                             |
| VCS1703A    | 1990 | Sheep | Australia | New South Wales   | Mt Hunter   | Monash Univ.                    | 1     | G                       | Y             | Virulent                      | Disease state - severe footrot                                |
| AC3597      | -    | Sheep | Australia | Western Australia | Albany      | Monash Univ.                    | 2     | H                       | R             | Unknown                       | -                                                             |
| AC3629      | -    | Sheep | Australia | Western Australia | Albany      | Monash Univ.                    | 2     | B                       | R             | Unknown                       | -                                                             |
| CS101       | -    | Sheep | Australia | Victoria          |             | Monash Univ.                    | 2     | B                       | R             | Benign                        |                                                               |
| AC293       | -    | Sheep | Australia | Western Australia | Albany      | Monash Univ.                    | 1     | B                       | Y             | Unknown                       | -                                                             |
| CS94A       | 1972 | Sheep | Australia |                   |             | Monash Univ.                    | 1     | B                       | Y             | Unknown                       | -                                                             |
| CS182A      | 1982 | Sheep | Australia |                   |             | Monash Univ.                    | 1     | A                       | Y             | Unknown                       | -                                                             |
| CS193       | 1980 | Sheep | Australia |                   |             | Monash Univ.                    | 1     | B                       | Y             | Unknown                       | -                                                             |
| CS219C      | -    | Sheep | Australia |                   |             | Monash Univ.                    | 1     | G                       | Y             | Unknown                       | -                                                             |
| CS247       | 1978 | Sheep | Australia |                   |             | Monash Univ.                    | 1     | G                       | Y             | Unknown                       | -                                                             |
| CS254       | 1978 | Sheep | Australia |                   |             | Monash Univ.                    | 1     | A                       | Y             | Unknown                       | -                                                             |
| C305        | -    | Sheep | Australia |                   |             | Monash Univ.                    | 2     | C                       | R             | Unknown                       | -                                                             |
| VCS1172     | 1978 | Sheep | Australia | New South Wales   | Moss Vale   | Univ. Sydney                    | 1     | D                       | Y             | Virulent                      | Disease state - severe footrot; Elastase positive             |
| 05-061-1-6  | 2005 | Sheep | Australia | Tasmania          | King Island | Univ. Sydney                    | 1     | A                       | Y             | Virulent                      | Disease state - severe footrot; Elastase positive             |
| 05-061-25-8 | 2005 | Sheep | Australia | Tasmania          | King Island | Univ. Sydney                    | 1     | E                       | Y             | Virulent                      | Disease state - severe footrot; Elastase positive             |
| 05-061-39-1 | 2005 | Sheep | Australia | Tasmania          | King Island | Univ. Sydney                    | 1     | G                       | Y             | Virulent                      | Disease state - severe footrot; Elastase positive             |

|            |      |       |           |                 |                 |              |   |   |   |              |                                                                    |
|------------|------|-------|-----------|-----------------|-----------------|--------------|---|---|---|--------------|--------------------------------------------------------------------|
| 08-251-8-1 | 2008 | Sheep | Australia | Tasmania        | King Island     | Univ. Sydney | 1 | M | Y | Virulent     | Disease state - severe footrot; Elastase positive                  |
| 09-096-6-1 | 2009 | Sheep | Australia | Tasmania        | King Island     | Univ. Sydney | 1 | M | Y | Virulent     | Disease state - severe footrot; Elastase positive                  |
| 10-058-1-3 | 2010 | Sheep | Australia | Tasmania        | King Island     | Univ. Sydney | 1 | C | Y | Virulent     | Disease state - severe footrot; Elastase negative                  |
| 11-163-4-1 | 2011 | Sheep | Australia | Tasmania        | King Island     | Univ. Sydney | 1 | M | Y | Virulent     | Disease state - severe footrot; Elastase negative                  |
| 06-057-6-8 | 2006 | Sheep | Australia | South Australia | Kangaroo Island | Univ. Sydney | 1 | B | Y | Virulent     | Disease state - severe footrot; Elastase negative                  |
| 08-011-4-1 | 2008 | Sheep | Australia | South Australia | Kangaroo Island | Univ. Sydney | 1 | E | Y | Virulent     | Disease state - footrot; Elastase positive                         |
| 11-139-7-1 | 2011 | Sheep | Australia | South Australia | Kangaroo Island | Univ. Sydney | 1 | C | Y | Virulent     | Disease state - footrot; Elastase positive                         |
| VCS1008    | 1974 | Sheep | Australia | Victoria        |                 | Univ. Sydney | 1 | C | Y | Virulent     | Disease state - severe footrot; Elastase positive                  |
| VCS1137    | 1978 | Sheep | Australia | New South Wales | Bathurst        | Univ. Sydney | 1 | E | Y | Virulent     | Disease state - severe footrot; Elastase positive                  |
| VCS1017    | 1975 | Sheep | Australia | New South Wales | Forbes          | Univ. Sydney | 1 | F | Y | Virulent     | Disease state - severe footrot; Elastase positive                  |
| VCS1687    | 1978 | Sheep | Australia | New South Wales | Bigga           | Univ. Sydney | 1 | H | Y | Virulent     | Disease state - severe footrot; Elastase positive                  |
| VCS1623    | 1985 | Sheep | Australia | New South Wales |                 | Univ. Sydney | 1 | I | Y | Virulent     | Disease state - severe footrot; Elastase positive                  |
| VCS1006    | 1974 | Sheep | Australia | New South Wales | Carcoar         | Univ. Sydney | 1 | B | Y | Virulent     | Disease state - severe footrot; Elastase positive                  |
| RBG-17     | 2000 | Sheep | Bhutan    | Bumthang        |                 | Univ. Sydney | 1 | B | R | Intermediate | Disease state - footrot; Elastase negative                         |
| 09-5148-1a | 2009 | Sheep | Denmark   | Jutland         | Ebeltoft        | NVI          | 1 | A | Y | Virulent     | Disease state - severe footrot;                                    |
| 09-5625-1a | 2009 | Sheep | Denmark   | Jutland         | Kolind          | NVI          | 1 | E | Y | Virulent     | Disease state - severe footrot; Stable protease; Elastase positive |
| 09-6137-1a | 2009 | Sheep | Denmark   | Jutland         | Kolind          | NVI          | 1 | A | Y | Virulent     | Disease state - severe footrot; Stable protease                    |
| 09-6137-2a | 2009 | Sheep | Denmark   | Jutland         | Kolind          | NVI          | 1 | A | Y | Virulent     | Disease state - severe footrot; Stable protease; Elastase positive |
| 09-6137-7a | 2009 | Sheep | Denmark   | Jutland         | Kolind          | NVI          | 1 | E | Y | Virulent     | Disease state - severe footrot; Stable protease; Elastase positive |

|             |      |        |         |          |              |              |   |   |   |          |                                                                    |
|-------------|------|--------|---------|----------|--------------|--------------|---|---|---|----------|--------------------------------------------------------------------|
| 09-6137-10a | 2009 | Sheep  | Denmark | Jutland  | Kolind       | NVI          | 1 | E | Y | Virulent | Disease state - severe footrot; Stable protease                    |
| 11-8906-1a  | 2011 | Sheep  | Denmark | Zealand  | Helsingø     | NVI          | 1 | E | Y | Virulent | Disease state - severe footrot; Stable protease                    |
| 09-5148-3a  | 2009 | Sheep  | Denmark | Jutland  | Ebeltoft     | NVI          | 1 | A | Y | Virulent | Disease state - severe footrot; Stable protease; Elastase positive |
| Ind-1       | -    | Sheep  | India   | Kashmir  |              | Monash Univ. | 1 | B | Y | Virulent | Disease state - footrot                                            |
| Nep-6-6     | 1993 | Sheep  | Nepal   | Kaski    |              | Univ. Sydney | 1 | E | Y | Virulent | Disease state - severe footrot; Elastase positive                  |
| 08-2321-5a  | 2008 | Sheep  | Norway  | Buskerud | Nesbyen      | NVI          | 2 | I | R | Benign   | Unstable protease; Elastase negative                               |
| 08-2408-4a  | 2008 | Sheep  | Norway  | Rogaland | Bryne        | NVI          | 1 | A | Y | Virulent | Stable protease; Elastase positive                                 |
| 09-1338-11b | 2009 | Cattle | Norway  | Akershus | Ås           | NVI          | 2 | E | R | Benign   | Unstable protease; Elastase negative                               |
| 09-1399-1b  | 2009 | Sheep  | Norway  | Rogaland | Bryne        | NVI          | 1 | A | Y | Virulent | Stable protease; Elastase positive                                 |
| 09-1715-2h  | 2009 | Cattle | Norway  | Nordland | Indre Kvarøy | NVI          | 2 | C | R | Benign   | Unstable protease; Elastase negative                               |
| 09-2912-7c  | 2009 | Cattle | Norway  | Troms    | Tromsdalen   | NVI          | 2 | M | R | Benign   | Unstable protease; Elastase negative                               |
| 09-3473-11a | 2009 | Sheep  | Norway  | Rogaland | Bryne        | NVI          | 1 | A | Y | Virulent | Stable protease; Elastase positive                                 |
| 09-4068-1a  | 2009 | Sheep  | Norway  | Hedmark  | Brumunddal   | NVI          | 2 | G | R | Benign   | Unstable protease; Elastase negative                               |
| 09-5097-1a  | 2009 | Sheep  | Norway  | Rogaland | Bryne        | NVI          | 1 | A | Y | Virulent | Stable protease; Elastase positive                                 |
| 09-5341-13b | 2009 | Sheep  | Norway  | Rogaland | Undheim      | NVI          | 1 | A | Y | Virulent | Stable protease; Elastase positive                                 |
| 09-5688-7d  | 2009 | Sheep  | Norway  | Rogaland | Fogn         | NVI          | 1 | A | Y | Virulent | Stable protease; Elastase positive                                 |
| 10-0483-9a  | 2010 | Sheep  | Norway  | Rogaland | Hjelmeland   | NVI          | 1 | A | Y | Virulent | Stable protease; Elastase positive                                 |
| 10-0781-4a  | 2010 | Sheep  | Norway  | Rogaland | Rogaland     | NVI          | 1 | A | Y | Virulent | Stable protease; Elastase positive                                 |
| 10-1096-8a  | 2010 | Cattle | Norway  | Rogaland | Bryne        | NVI          | 2 | B | R | Benign   | Unstable protease; Elastase negative                               |
| 10-3073-1a  | 2010 | Sheep  | Norway  | Rogaland | Fister       | NVI          | 1 | A | Y | Virulent | Stable protease; Elastase positive                                 |
| 10-3073-4b  | 2010 | Sheep  | Norway  | Rogaland | Fister       | NVI          | 1 | H | Y | Virulent | Stable protease; Elastase positive                                 |
| 10-4697-2b  | 2010 | Sheep  | Norway  | Rogaland | Rennesøy     | NVI          | 2 | C | R | Benign   | Unstable protease; Elastase negative                               |
| 10-5149-1a  | 2010 | Goat   | Norway  | Rogaland | Karmsund     | NVI          | 2 | B | R | Benign   | Unstable protease; Elastase negative                               |
| 09-1622-6h  | 2009 | Sheep  | Norway  | Rogaland | Bjerkreim    | NVI          | 2 | C | R | Benign   | Unstable protease; Elastase negative                               |
| 09-3055-14a | 2009 | Sheep  | Norway  | Hedmark  | Brumunddal   | NVI          | 2 | A | R | Benign   | Unstable protease; Elastase negative                               |
| 09-3796-10c | 2009 | Sheep  | Norway  | Rogaland | Bryne        | NVI          | 1 | A | Y | Virulent | Stable protease; Elastase positive                                 |
| 09-5005-8a  | 2009 | Sheep  | Norway  | Rogaland | Ålgård       | NVI          | 1 | A | Y | Virulent | Stable protease; Elastase positive                                 |
| 09-5146-2b  | 2009 | Sheep  | Norway  | Oppland  | Snertingdal  | NVI          | 2 | B | R | Benign   | Unstable protease; Elastase negative                               |
| 09-5146-4a  | 2009 | Sheep  | Norway  | Oppland  | Snertingdal  | NVI          | 2 | I | R | Benign   | Unstable protease; Elastase negative                               |
| 09-5150-4a  | 2009 | Sheep  | Norway  | Akershus | Rykkinn      | NVI          | 2 | A | R | Benign   | Unstable protease; Elastase negative                               |

|             |      |        |        |                      |             |     |   |   |   |          |                                                   |
|-------------|------|--------|--------|----------------------|-------------|-----|---|---|---|----------|---------------------------------------------------|
| 09-5436-2a  | 2009 | Sheep  | Norway | Akershus             | Skui        | NVI | 2 | A | R | Benign   | Unstable protease; Elastase negative              |
| 10-0857-2c  | 2010 | Sheep  | Norway | Rogaland             | Undheim     | NVI | 1 | H | Y | Virulent | Stable protease; Elastase positive                |
| 10-2193-2c  | 2010 | Sheep  | Norway | Oppland              | Lillehammer | NVI | 2 | G | R | Benign   | Unstable protease; Elastase negative              |
| 10-4333-18b | 2010 | Cattle | Norway | Rogaland             | Rennesøy    | NVI | 1 | A | Y | Virulent | Stable protease; Elastase positive                |
| 08-2408-5a  | 2008 | Sheep  | Norway | Rogaland             | Bryne       | NVI | 1 | I | Y | Virulent | Stable protease; Elastase positive                |
| 10-2777-3g  | 2010 | Sheep  | Norway | Rogaland             | Fister      | NVI | 1 | B | Y | Virulent | Stable protease; Elastase positive                |
| 10-5036-5c  | 2010 | Sheep  | Norway | Rogaland             | Rennesøy    | NVI | 1 | A | Y | Virulent | Stable protease                                   |
| 10-5036-5a  | 2010 | Sheep  | Norway | Rogaland             | Rennesøy    | NVI | 1 | C | Y | Virulent | Stable protease                                   |
| 10-5036-12c | 2010 | Sheep  | Norway | Rogaland             | Rennesøy    | NVI | 2 | C | R | Benign   | Unstable protease                                 |
| 10-1778-2a  | 2010 | Sheep  | Norway | Telemark             | Vråliosén   | NVI | 2 | A | R | Benign   | Unstable protease; Elastase negative              |
| 10-1837-12a | 2010 | Sheep  | Norway | Rogaland             | Rennesøy    | NVI | 1 | A | Y | Virulent | Stable protease; Elastase positive                |
| AN363-05    | 2005 | Sheep  | Sweden | Västra Götalands län |             | SVA | 1 | B | Y | Virulent | Stable protease                                   |
| AN484-05    | 2005 | Sheep  | Sweden | Skåne län            |             | SVA | 2 | E | R | Benign   | Unstable protease                                 |
| 07BKT018497 | 2007 | Sheep  | Sweden | Blekinge län         |             | SVA | 1 | B | Y | Virulent | Stable protease                                   |
| 12BKT031675 | 2012 | Cattle | Sweden | Gotlands län         |             | SVA | 2 | H | R | Benign   | Unstable protease                                 |
| 11BKT048543 | 2011 | Sheep  | Sweden | Östergötlands län    |             | SVA | 2 | C | R | Benign   | Disease state - benign footrot, Unstable protease |
| 11BKT051780 | 2011 | Sheep  | Sweden | Södermanlands län    |             | SVA | 2 | B | R | Benign   | Disease state - benign footrot, Unstable protease |
| 12BKT052990 | 2012 | Sheep  | Sweden | Kronobergs län       |             | SVA | 2 | A | R | Benign   | Disease state - benign footrot                    |
| 11BKT055907 | 2011 | Sheep  | Sweden | Östergötlands län    |             | SVA | 2 | G | R | Benign   | Disease state - virulent footrot                  |
| 11BKT058516 | 2011 | Sheep  | Sweden | Jönköpings län       |             | SVA | 2 | E | R | Benign   | Disease state - virulent footrot                  |
| 11BKT058890 | 2011 | Sheep  | Sweden | Örebro län           |             | SVA | 2 | G | R | Benign   | Disease state - benign footrot, Unstable protease |
| 11BKT062646 | 2011 | Sheep  | Sweden | Dalarnas län         |             | SVA | 1 | G | Y | Virulent | Disease state - severe footrot, Stable protease   |
| 08BKT063297 | 2008 | Sheep  | Sweden | Skåne län            |             | SVA | 1 | G | Y | Virulent | Stable protease                                   |
| 12BKT066722 | 2012 | Sheep  | Sweden | Dalarnas län         |             | SVA | 1 | G | Y | Virulent | Disease state - virulent footrot                  |
| 12BKT066771 | 2012 | Goat   | Sweden | Örebro län           |             | SVA | 2 | B | R | Benign   | Disease state - benign footrot, Unstable protease |
| 11BKT068051 | 2011 | Sheep  | Sweden | Gotlands län         |             | SVA | 2 | B | R | Benign   | Disease state - benign footrot, Unstable protease |
| 11BKT072696 | 2011 | Sheep  | Sweden | Östergötlands län    |             | SVA | 2 | G | R | Benign   | Disease state - benign footrot, Unstable protease |

|             |      |        |        |                   |  |              |   |   |   |          |                                |
|-------------|------|--------|--------|-------------------|--|--------------|---|---|---|----------|--------------------------------|
| 12BKT073391 | 2012 | Cattle | Sweden | Södermanlands län |  | SVA          | 2 | B | R | Benign   | Unstable protease              |
| 153-LB2     | -    | Sheep  | UK     |                   |  | Monash Univ. | 1 | I | Y | Virulent | Disease state - severe footrot |

<sup>a</sup> Monash University, Australia (Monash Univ.); The National Veterinary Institute, Sweden (SVA); The Norwegian Veterinary Institute (NVI); The University of Sydney, Australia (Univ. Sydney).
