# Supplementary material for: Genomic Evidence for a Globally Distributed, Bimodal Population in the Ovine Footrot Pathogen Dichelobacter nodosus
Source: PubMed Central journal article supplement — mBio. 2014 Sep 30;5(5):e01821-14. doi: 10.1128/mBio.01821-14 (PMC4196234; doi:10.1128/mbio.01821-14), 2014-09-30
Supplement: mbo005142008st6.pdf [file mbo005142008st6.pdf]

**Supplemental Table S6.** Details of genome sequencing and analysis data

| Isolates    | Reads (L) | Reads (R) | Length of Reads | Average length after trimming | Reads (post-filter) | Retained reads % (post-filter) | Total yield of sequence (post filter) | Read coverage | Contigs in draft assembly | Total length of contigs | K-mer value used for the assembly | *SRA accession |
|-------------|-----------|-----------|-----------------|-------------------------------|---------------------|--------------------------------|---------------------------------------|---------------|---------------------------|-------------------------|-----------------------------------|----------------|
| CS287       | 451884    | 451884    | 151             | 151                           | 898950              | 99.47%                         | 135741450                             | 101.9         | 41                        | 1332452                 | 75                                | ERX472278      |
| CS310       | 520467    | 520467    | 151             | 151                           | 1026957             | 98.66%                         | 155070507                             | 116.6         | 49                        | 1330254                 | 85                                | ERX472279      |
| CS311       | 558784    | 558784    | 151             | 151                           | 1110775             | 99.39%                         | 167727025                             | 128.2         | 37                        | 1308053                 | 85                                | ERX472280      |
| JIR1204     | 789733    | 789733    | 101             | 95                            | 1556079             | 98.52%                         | 147827505                             | 112.6         | 57                        | 1313125                 | 55                                | ERX472281      |
| VCS1172     | 375720    | 375720    | 100             | 88                            | 736922              | 98.07%                         | 64849136                              | 47.1          | 485                       | 1376611                 | SPADES                            | ERX472282      |
| VCS1001     | 1840750   | 1840750   | 101             | 93                            | 3624093             | 98.44%                         | 337040649                             | 246.9         | 56                        | 1365261                 | 65                                | ERX472283      |
| HA322       | 972164    | 972164    | 151             | 149                           | 1944276             | 100.00%                        | 289697124                             | 201.5         | 96                        | 1437611                 | 85                                | ERX472284      |
| AC3466      | 544358    | 544358    | 151             | 122                           | 1040150             | 95.54%                         | 126898300                             | 91.8          | 62                        | 1382229                 | 75                                | ERX472285      |
| AC3486      | 459232    | 459232    | 151             | 125                           | 907402              | 98.80%                         | 113425250                             | 82.4          | 65                        | 1375730                 | 75                                | ERX472286      |
| AC3488      | 135899    | 135899    | 151             | 125                           | 268803              | 98.90%                         | 33600375                              | 25.2          | 65                        | 1333181                 | 55                                | ERX472287      |
| VCS1703A    | 2082893   | 2082893   | 101             | 93                            | 4095861             | 98.32%                         | 380915073                             | 279.9         | 57                        | 1361104                 | 65                                | ERX472288      |
| AC3597      | 895073    | 895073    | 101             | 94                            | 1760724             | 98.36%                         | 165508056                             | 125.5         | 78                        | 1319210                 | 55                                | ERX472289      |
| AC3629      | 553707    | 553707    | 151             | 121                           | 1102666             | 99.57%                         | 133422586                             | 99.6          | 54                        | 1339182                 | 75                                | ERX472290      |
| CS101       | 914178    | 914178    | 151             | 150                           | 1828314             | 100.00%                        | 274247100                             | 204.1         | 48                        | 1343900                 | 95                                | ERX472291      |
| AC293       | 679782    | 679782    | 151             | 121                           | 1354757             | 99.65%                         | 163925597                             | 116.1         | 63                        | 1412341                 | 75                                | ERX472292      |
| 05-061-1-6  | 5983326   | 5983326   | 101             | 84                            | 10635557            | 88.88%                         | 893386788                             | 667.3         | 60                        | 1338827                 | 65                                | ERX472293      |
| 05-061-25-8 | 859741    | 859741    | 151             | 148                           | 1719435             | 100.00%                        | 254476380                             | 188.2         | 90                        | 1352151                 | 95                                | ERX472294      |
| 05-061-39-1 | 4157689   | 4157689   | 101             | 85                            | 7160796             | 86.12%                         | 608667660                             | 458.1         | 45                        | 1328583                 | 65                                | ERX472295      |
| 08-251-8-1  | 3056664   | 3056664   | 101             | 85                            | 5213844             | 85.29%                         | 443176740                             | 333.8         | 53                        | 1327520                 | 65                                | ERX472296      |
| 09-096-6-1  | 4879776   | 4879776   | 101             | 85                            | 8721257             | 89.36%                         | 741306845                             | 554.3         | 46                        | 1337334                 | 75                                | ERX472297      |
| 10-058-1-3  | 4912923   | 4912923   | 101             | 85                            | 8645642             | 87.99%                         | 734879570                             | 539.7         | 86                        | 1361712                 | 75                                | ERX472298      |
| 11-163-4-1  | 787195    | 787195    | 151             | 148                           | 1574327             | 100.00%                        | 233000396                             | 165.5         | 187                       | 1408201                 | 75                                | ERX472299      |
| 06-057-6-8  | 4674278   | 4674278   | 101             | 85                            | 8158400             | 87.27%                         | 693464000                             | 518.2         | 67                        | 1338301                 | 75                                | ERX472300      |
| 08-011-4-1  | 3338521   | 3338521   | 101             | 85                            | 4851298             | 72.66%                         | 412360330                             | 309.1         | 53                        | 1334153                 | 75                                | ERX472301      |
| 11-139-7-1  | 719857    | 719857    | 151             | 119                           | 1435191             | 99.69%                         | 170787729                             | 127.5         | 55                        | 1339478                 | 65                                | ERX472302      |
| VCS1008     | 2226235   | 2226235   | 151             | 122                           | 4447438             | 99.89%                         | 542587436                             | 387.3         | 55                        | 1400787                 | 75                                | ERX472303      |

|             |         |         |     |     |          |         |           |       |     |         |    |           |
|-------------|---------|---------|-----|-----|----------|---------|-----------|-------|-----|---------|----|-----------|
| VCS1137     | 1823047 | 1823047 | 151 | 123 | 3641489  | 99.87%  | 447903147 | 329.5 | 48  | 1359395 | 85 | ERX472304 |
| VCS1017     | 735044  | 735044  | 151 | 114 | 1468517  | 99.89%  | 167410938 | 119.4 | 70  | 1402458 | 75 | ERX472305 |
| VCS1687     | 924285  | 924285  | 151 | 114 | 1846514  | 99.89%  | 210502596 | 145.6 | 89  | 1445469 | 65 | ERX472306 |
| VCS1623     | 806694  | 806694  | 151 | 114 | 1611019  | 99.85%  | 183656166 | 130.2 | 81  | 1410522 | 65 | ERX472307 |
| CS94A       | 878832  | 878832  | 151 | 147 | 1757629  | 100.00% | 258371463 | 179.5 | 65  | 1439294 | 85 | ERX472308 |
| CS182A      | 1121010 | 1121010 | 151 | 147 | 2241963  | 100.00% | 329568561 | 242.1 | 48  | 1361204 | 85 | ERX472309 |
| CS193       | 1632169 | 1632169 | 151 | 147 | 3264227  | 100.00% | 479841369 | 333.9 | 81  | 1437203 | 95 | ERX472310 |
| CS219C      | 401052  | 401052  | 151 | 148 | 802087   | 100.00% | 118708876 | 82.5  | 81  | 1439451 | 85 | ERX472311 |
| CS247       | 764317  | 764317  | 151 | 149 | 1528596  | 100.00% | 227760804 | 156.2 | 120 | 1458209 | 85 | ERX472312 |
| CS254       | 521552  | 521552  | 151 | 150 | 1043076  | 100.00% | 156461400 | 114.6 | 48  | 1364735 | 85 | ERX472313 |
| C305        | 161673  | 161673  | 151 | 149 | 323343   | 100.00% | 48178107  | 33.5  | 156 | 1439044 | 75 | ERX472314 |
| VCS1006     | 768680  | 768680  | 151 | 119 | 1532707  | 99.70%  | 182392133 | 127.4 | 70  | 1431628 | 75 | ERX472315 |
| RBG-17      | 5606735 | 5606735 | 101 | 84  | 9629323  | 85.87%  | 808863132 | 586.6 | 62  | 1378955 | 75 | ERX472316 |
| 09-5148-1a  | 560418  | 560418  | 151 | 117 | 1103395  | 98.44%  | 129097215 | 98.7  | 48  | 1307721 | 75 | ERX472317 |
| 09-5625-1a  | 1466940 | 1466940 | 151 | 121 | 2893281  | 98.62%  | 350087001 | 259.7 | 49  | 1348262 | 75 | ERX472318 |
| 09-6137-1a  | 1302152 | 1302152 | 151 | 122 | 2562519  | 98.40%  | 312627318 | 238.7 | 44  | 1309696 | 85 | ERX472319 |
| 09-6137-2a  | 487899  | 487899  | 151 | 112 | 970298   | 99.44%  | 108673376 | 83.3  | 44  | 1304470 | 55 | ERX472320 |
| 09-6137-7a  | 499930  | 499930  | 151 | 112 | 998077   | 99.82%  | 111784624 | 82.9  | 65  | 1348387 | 75 | ERX472321 |
| 09-6137-10a | 607792  | 607792  | 151 | 112 | 1211708  | 99.68%  | 135711296 | 101.6 | 68  | 1335154 | 75 | ERX472322 |
| 11-8906-1a  | 758874  | 758874  | 151 | 112 | 1502690  | 99.01%  | 168301280 | 130.0 | 45  | 1294465 | 75 | ERX472323 |
| 09-5148-3a  | 552550  | 552550  | 151 | 118 | 1094707  | 99.06%  | 129175426 | 98.9  | 46  | 1306287 | 65 | ERX472324 |
| Ind-1       | 852196  | 852196  | 151 | 114 | 1702263  | 99.88%  | 194057982 | 148.8 | 28  | 1304006 | 75 | ERX472325 |
| Nep-6-6     | 2884672 | 2884672 | 101 | 80  | 4917265  | 85.23%  | 393381200 | 283.5 | 82  | 1387495 | 65 | ERX472326 |
| 08-2321-5a  | 3221288 | 3221288 | 101 | 84  | 5808091  | 90.15%  | 487879644 | 360.4 | 64  | 1353696 | 75 | ERX472327 |
| 08-2408-4a  | 4938310 | 4938310 | 101 | 85  | 9146480  | 92.61%  | 777450800 | 600.6 | 37  | 1294515 | 75 | ERX472328 |
| 09-1338-11b | 4099548 | 4099548 | 101 | 85  | 7456943  | 90.95%  | 633840155 | 459.4 | 81  | 1379657 | 75 | ERX472329 |
| 09-1399-1b  | 4040081 | 4040081 | 101 | 85  | 7343323  | 90.88%  | 624182455 | 480.2 | 44  | 1299732 | 75 | ERX472330 |
| 09-1715-2h  | 3463504 | 3463504 | 101 | 85  | 5958304  | 86.02%  | 506455840 | 380.4 | 62  | 1331330 | 75 | ERX472331 |
| 09-2912-7c  | 4762529 | 4762529 | 101 | 85  | 8558564  | 89.85%  | 727477940 | 535.5 | 66  | 1358601 | 85 | ERX472332 |
| 09-3473-11a | 4653184 | 4653184 | 101 | 85  | 8330856  | 89.52%  | 708122760 | 545.0 | 44  | 1299264 | 75 | ERX472333 |
| 09-4068-1a  | 2635196 | 2635196 | 101 | 77  | 4472215  | 84.86%  | 344360555 | 262.1 | 66  | 1313900 | 65 | ERX472334 |
| 09-5097-1a  | 5475928 | 5475928 | 101 | 77  | 9277064  | 84.71%  | 714333928 | 551.2 | 46  | 1295997 | 65 | ERX472335 |
| 09-5341-13b | 6549030 | 6549030 | 101 | 77  | 11265877 | 86.01%  | 867472529 | 669.1 | 41  | 1296406 | 65 | ERX472336 |

|             |         |         |     |     |          |        |            |       |     |         |     |           |
|-------------|---------|---------|-----|-----|----------|--------|------------|-------|-----|---------|-----|-----------|
| 09-5688-7d  | 4989676 | 4989676 | 101 | 77  | 8270190  | 82.87% | 636804630  | 491.1 | 49  | 1296783 | 65  | ERX472337 |
| 10-0483-9a  | 4784488 | 4784488 | 101 | 77  | 7320744  | 76.50% | 563697288  | 434.9 | 46  | 1296075 | 65  | ERX472338 |
| 10-0781-4a  | 4052520 | 4052520 | 101 | 80  | 6928809  | 85.49% | 554304720  | 427.8 | 47  | 1295786 | 65  | ERX472339 |
| 10-1096-8a  | 3559678 | 3559678 | 101 | 80  | 6211720  | 87.25% | 496937600  | 375.5 | 54  | 1323522 | 55  | ERX472340 |
| 10-3073-1a  | 4768193 | 4768193 | 101 | 80  | 8281679  | 86.84% | 662534320  | 512.4 | 42  | 1293054 | 65  | ERX472341 |
| 10-3073-4b  | 4465355 | 4465355 | 101 | 80  | 7626677  | 85.40% | 610134160  | 460.0 | 64  | 1326442 | 65  | ERX472342 |
| 10-4697-2b  | 7869851 | 7869851 | 101 | 80  | 13669763 | 86.85% | 1093581040 | 798.8 | 61  | 1369061 | 75  | ERX472343 |
| 10-5149-1a  | 4791706 | 4791706 | 101 | 80  | 8366084  | 87.30% | 669286720  | 486.5 | 72  | 1375717 | 65  | ERX472344 |
| 09-1622-6h  | 3919791 | 3919791 | 101 | 85  | 7201990  | 91.87% | 612169150  | 455.8 | 53  | 1343189 | 65  | ERX472345 |
| 09-3055-14a | 4540833 | 4540833 | 101 | 85  | 8268946  | 91.05% | 702860410  | 529.4 | 41  | 1327546 | 65  | ERX472346 |
| 09-3796-10c | 4920499 | 4920499 | 101 | 85  | 8869450  | 90.13% | 753903250  | 580.1 | 40  | 1299514 | 75  | ERX472347 |
| 09-5005-8a  | 5315511 | 5315511 | 101 | 77  | 9073515  | 85.35% | 698660655  | 540.3 | 46  | 1293196 | 65  | ERX472348 |
| 09-5146-2b  | 4701211 | 4701211 | 101 | 77  | 7915208  | 84.18% | 609471016  | 455.2 | 59  | 1338825 | 65  | ERX472349 |
| 09-5146-4a  | 4322410 | 4322410 | 101 | 77  | 7273108  | 84.13% | 560029316  | 402.4 | 92  | 1391719 | 65  | ERX472350 |
| 09-5150-4a  | 4206942 | 4206942 | 101 | 77  | 6617695  | 78.65% | 509562515  | 387.5 | 52  | 1315163 | 65  | ERX472351 |
| 09-5436-2a  | 5042813 | 5042813 | 101 | 77  | 8475618  | 84.04% | 652622586  | 486.1 | 61  | 1342578 | 65  | ERX472352 |
| 10-0857-2c  | 4906892 | 4906892 | 101 | 80  | 8174241  | 83.29% | 653939280  | 494.0 | 52  | 1323641 | 75  | ERX472353 |
| 10-2193-2c  | 2960815 | 2960815 | 101 | 80  | 4656920  | 78.64% | 372553600  | 282.9 | 59  | 1316809 | 65  | ERX472354 |
| 10-4333-18b | 5177502 | 5177502 | 101 | 80  | 8892391  | 85.88% | 711391280  | 537.4 | 53  | 1323794 | 65  | ERX472355 |
| 08-2408-5a  | 538591  | 538591  | 151 | 125 | 1075361  | 99.83% | 134420125  | 103.5 | 37  | 1298564 | 75  | ERX472356 |
| 10-2777-3g  | 562962  | 562962  | 151 | 125 | 1124427  | 99.87% | 140553375  | 108.9 | 34  | 1291136 | 75  | ERX472357 |
| 10-5036-5c  | 557715  | 557715  | 151 | 125 | 1113498  | 99.83% | 139187250  | 107.5 | 37  | 1294396 | 75  | ERX472358 |
| 10-5036-5a  | 606767  | 606767  | 151 | 125 | 1210560  | 99.75% | 151320000  | 116.5 | 37  | 1299413 | 75  | ERX472359 |
| 10-5036-12c | 624719  | 624719  | 151 | 125 | 1243102  | 99.49% | 155387750  | 120.0 | 50  | 1295211 | 75  | ERX472360 |
| 10-1778-2a  | 703115  | 703115  | 151 | 93  | 1384341  | 98.44% | 128743713  | 99.4  | 54  | 1295363 | 55  | ERX472361 |
| 10-1837-12a | 799029  | 799029  | 151 | 93  | 1572279  | 98.39% | 146221947  | 113.8 | 52  | 1284608 | 55  | ERX472362 |
| AN363-05    | 1199754 | 1199754 | 250 | 225 | 2399027  | 99.98% | 539781075  | 396.3 | 43  | 1362096 | 165 | ERX472363 |
| AN484-05    | 1444747 | 1444747 | 250 | 225 | 2888368  | 99.96% | 649882800  | 485.8 | 59  | 1337892 | 165 | ERX472364 |
| 07BKT018497 | 611745  | 611745  | 250 | 241 | 1222846  | 99.95% | 294705886  | 203.7 | 71  | 1446640 | 155 | ERX472365 |
| 12BKT031675 | 1924460 | 1924460 | 250 | 115 | 3845618  | 99.91% | 442246070  | 326.0 | 217 | 1356693 | 145 | ERX472366 |
| 11BKT048543 | 1154590 | 1154590 | 250 | 238 | 2308726  | 99.98% | 549476788  | 410.9 | 70  | 1337200 | 155 | ERX472367 |
| 11BKT051780 | 1318042 | 1318042 | 250 | 123 | 2634297  | 99.93% | 324018531  | 243.9 | 123 | 1328385 | 135 | ERX472368 |
| 12BKT052990 | 1073480 | 1073480 | 250 | 238 | 2146314  | 99.97% | 510822732  | 378.4 | 59  | 1350111 | 165 | ERX472369 |

|             |         |         |     |     |         |        |           |       |     |         |     |           |
|-------------|---------|---------|-----|-----|---------|--------|-----------|-------|-----|---------|-----|-----------|
| 11BKT055907 | 952736  | 952736  | 250 | 241 | 1905094 | 99.98% | 459127654 | 349.3 | 40  | 1314303 | 165 | ERX472370 |
| 11BKT058516 | 1358989 | 1358989 | 250 | 110 | 2716254 | 99.94% | 298787940 | 225.7 | 172 | 1323901 | 125 | ERX472371 |
| 11BKT058890 | 992757  | 992757  | 250 | 105 | 1983780 | 99.91% | 208296900 | 155.2 | 195 | 1341717 | 115 | ERX472372 |
| 11BKT062646 | 2606706 | 2606706 | 250 | 109 | 5207625 | 99.89% | 567631125 | 428.7 | 117 | 1324207 | 135 | ERX472373 |
| 08BKT063297 | 1183183 | 1183183 | 250 | 234 | 2365707 | 99.97% | 553575438 | 416.2 | 46  | 1330048 | 155 | ERX472374 |
| 12BKT066722 | 1376767 | 1376767 | 250 | 222 | 2752451 | 99.96% | 611044122 | 459.9 | 40  | 1328624 | 155 | ERX472375 |
| 12BKT066771 | 1599545 | 1599545 | 250 | 113 | 3196808 | 99.93% | 361239304 | 275.6 | 139 | 1310506 | 135 | ERX472376 |
| 11BKT068051 | 1035839 | 1035839 | 250 | 115 | 2069247 | 99.88% | 237963405 | 180.6 | 171 | 1317779 | 125 | ERX472377 |
| 11BKT072696 | 477343  | 477343  | 250 | 120 | 953757  | 99.90% | 114450840 | 87.7  | 345 | 1304882 | 105 | ERX472378 |
| 12BKT073391 | 1060936 | 1060936 | 250 | 232 | 2121124 | 99.96% | 492100768 | 368.5 | 46  | 1335294 | 145 | ERX472379 |
| 153-LB2     | 922662  | 922662  | 151 | 93  | 1816150 | 98.42% | 168901950 | 130.3 | 51  | 1295893 | 65  | ERX472380 |

<sup>a</sup>Sequence Read Archive Accession
