# Supplementary material for: Genomic Evidence for a Globally Distributed, Bimodal Population in the Ovine Footrot Pathogen Dichelobacter nodosus
Source: PubMed Central journal article supplement — mBio. 2014 Sep 30;5(5):e01821-14. doi: 10.1128/mBio.01821-14 (PMC4196234; doi:10.1128/mbio.01821-14), 2014-09-30
Supplement: mbo005142008st7.pdf [file mbo005142008st7.pdf]

**Supplemental Table S7.** *fimA* or *fimZ* sequences obtained from GenBank

| <sup>a</sup> Strain Designation used in Tree | Country | Serogroup | Accession  |
|----------------------------------------------|---------|-----------|------------|
| Bn351                                        | AU      | H         | M26980.1   |
| H-NZ1                                        | NZ      | H         | AF146890.1 |
| H-vacstr-S-P                                 | NZ      | H         | AF316611.1 |
| JKS-08E                                      | IN      | E         | HM190159.1 |
| M-SPAHL                                      | NZ      | M         | AF144236.1 |
| M-NZ1                                        | NZ      | M         | AF146889.1 |
| M-NZ2                                        | NZ      | M         | AY835839.1 |
| NEP152                                       | NP      | M         | AF038921.1 |
| NEP115                                       | NP      | M         | AF038920.1 |
| SVC-07/097/5-1                               | AU      | M         | HM486324.1 |
| AP                                           | IN      | G         | JX912561.1 |
| SVC-08/251/4-1                               | AU      | M         | HM486325.1 |
| SVC-09/096/1-1                               | AU      | M         | HM486326.1 |
| VCS1008                                      | AU      | C         | X52405.1   |
| VCS1617                                      | AU      | C         | X52406.1   |
| C-vacstr-S-P                                 | NZ      | C         | AF316608.1 |
| C-NZ1                                        | NZ      | C         | AF146884.1 |
| C-NZ3                                        | NZ      | C         | AY835829.1 |
| C-NZ4                                        | NZ      | C         | AY835830.1 |
| C-NZ2                                        | NZ      | C         | AF146885.1 |
| VCS1137                                      | AU      | E         | M32230.1   |
| E-vacstr-S-P                                 | NZ      | E         | AF316603.1 |
| E-NZ1                                        | NZ      | E         | AF146887.1 |
| VCS1114                                      | AU      | E         | X52407.1   |
| E-NZ5                                        | NZ      | E         | AY835834.1 |
| E-NZ3                                        | NZ      | E         | AY835832.1 |
| E-NZ4                                        | NZ      | E         | AY835833.1 |
| H-NZ2                                        | NZ      | H         | AF146891.1 |
| H-de1                                        | DE      | H         | EU884441.1 |
| VCS1215b                                     | AU      | H         | X52390.1   |
| VCS1172b                                     | AU      | D         | X52389.1   |
| VCS1220                                      | AU      | G         | X52409.1   |
| VCS1703A                                     | AU      | G         | CP000513.1 |
| Kerala1                                      | IN      | G         | JX648294.1 |
| G-vacstr-S-P                                 | NZ      | G         | AF316609.1 |
| G-NZ1                                        | NZ      | G         | AF146886.1 |
| G-NZ2                                        | NZ      | G         | AY835836.1 |
| JKS20                                        | IN      | G         | GU997637.1 |
| Malaysia1                                    | MY      | B         | AY010900.1 |
| JKS-15B                                      | IN      | B         | GU797089.1 |
| VCS1006                                      | AU      | B         | X52404.1   |
| AC290                                        | AU      | B         | M37473.1   |

|                  |    |   |            |
|------------------|----|---|------------|
| TNS-27B          | IN | B | KC252612.1 |
| AC293            | AU | B | M37474.1   |
| AC127            | AU | B | M37472.1   |
| AC6              | AU | B | M37471.1   |
| DSM-23057        | AU | B | JQ277463.1 |
| JKS-01B          | IN | B | GU362417.1 |
| B-NZ3            | NZ | B | AF145220.1 |
| B-NZ2            | NZ | B | AF145219.1 |
| 2011-01-5140-3A  | NO | B | JX863080.1 |
| B2-NZ1           | NZ | B | AY835841.1 |
| B-NZ1            | NZ | B | AF145218.1 |
| B2541-vacstr-S-P | NZ | B | AF316606.1 |
| B-NZ5            | NZ | B | AF145221.1 |
| B2-vacstr-S-P    | NZ | B | AF316607.1 |
| B1-vacstr-S-P    | NZ | B | AF316605.1 |
| B-NZ4            | NZ | B | AF148992.1 |
| B-NZ6            | NZ | B | AF145222.1 |
| B-de1            | DE | B | EU884440.1 |
| B2541-NZ1        | NZ | B | AY835840.1 |
| VCS1017          | AU | F | X52408.1   |
| F-vacstr-S-P     | NZ | F | AF316604.1 |
| F-NZ1            | NZ | F | AF146888.1 |
| F-NZ2            | NZ | F | AY835835.1 |
| APS01I           | IN | I | JN601142.1 |
| VCS1636          | AU | I | X52410.1   |
| I-NZ1            | NZ | I | AY835837.1 |
| I-NZ3            | NZ | I | AF254743.1 |
| I-NZ2            | NZ | I | AY835838.1 |
| VCS1001          | AU | A | X52403.1   |
| A-vacstr-S-P     | NZ | A | AF316602.1 |
| A-NZ2            | NZ | A | AY835827.1 |
| A-NZ3            | NZ | A | AY835828.1 |
| A-NZ1            | NZ | A | AF145217.1 |
| APMBL-01A        | IN | A | JQ989347.1 |
| VCS1172a         | AU | D | X52389.1   |
| D-vacstr-S-P     | NZ | D | AF316610.1 |

---

<sup>a</sup>Refers to Figure 3
