# Supplementary figures and images for: Genomic Evidence for a Globally Distributed, Bimodal Population in the Ovine Footrot Pathogen Dichelobacter nodosus
Source: PubMed Central journal article supplement — mBio. 2014 Sep 30;5(5):e01821-14. doi: 10.1128/mBio.01821-14 (PMC4196234; doi:10.1128/mbio.01821-14), 2014-09-30

0.01

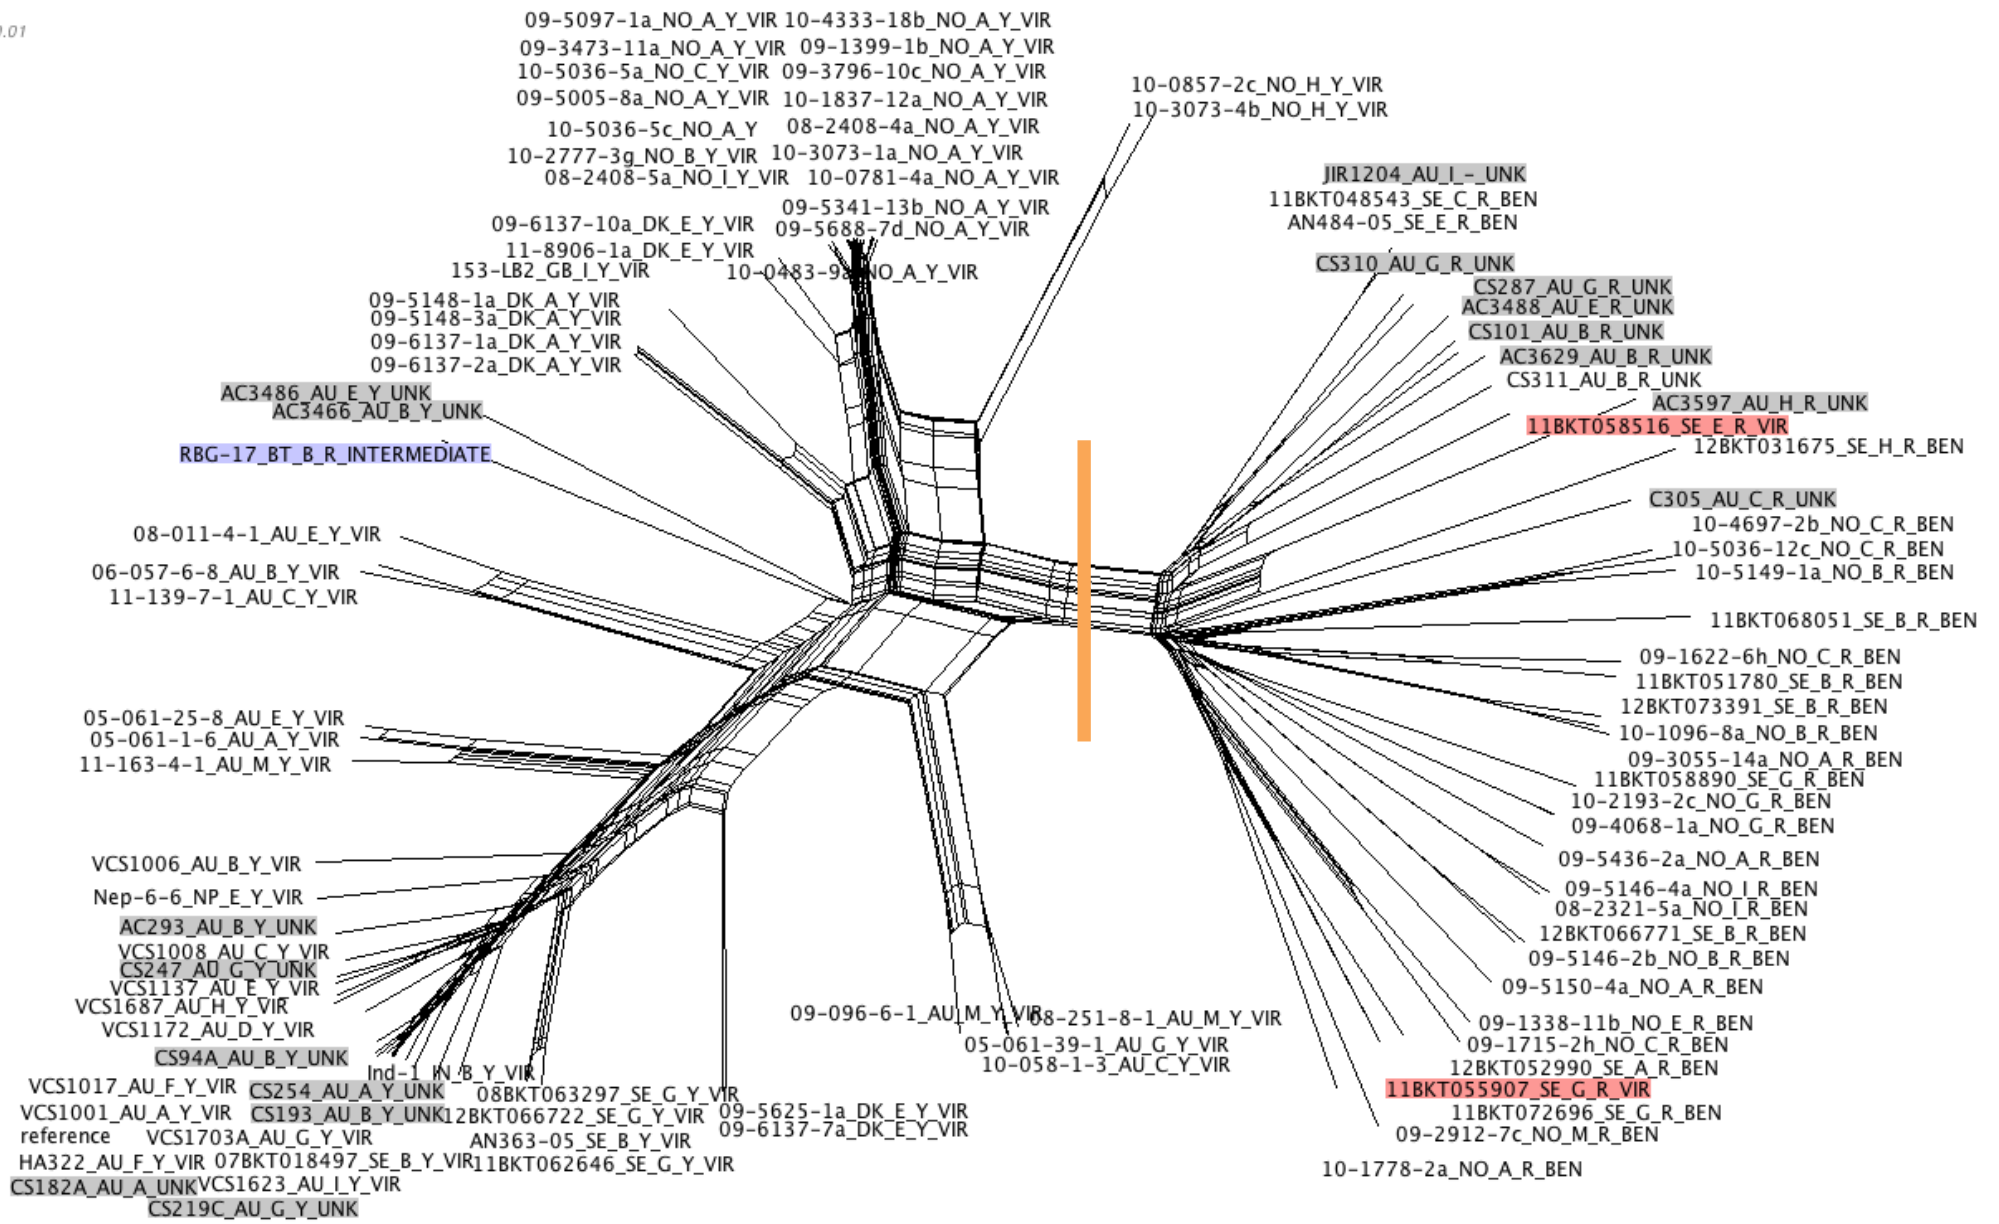

Clade I

Clade II

Supplement: mbo005142008sf1.pdf [file mbo005142008sf1.pdf]

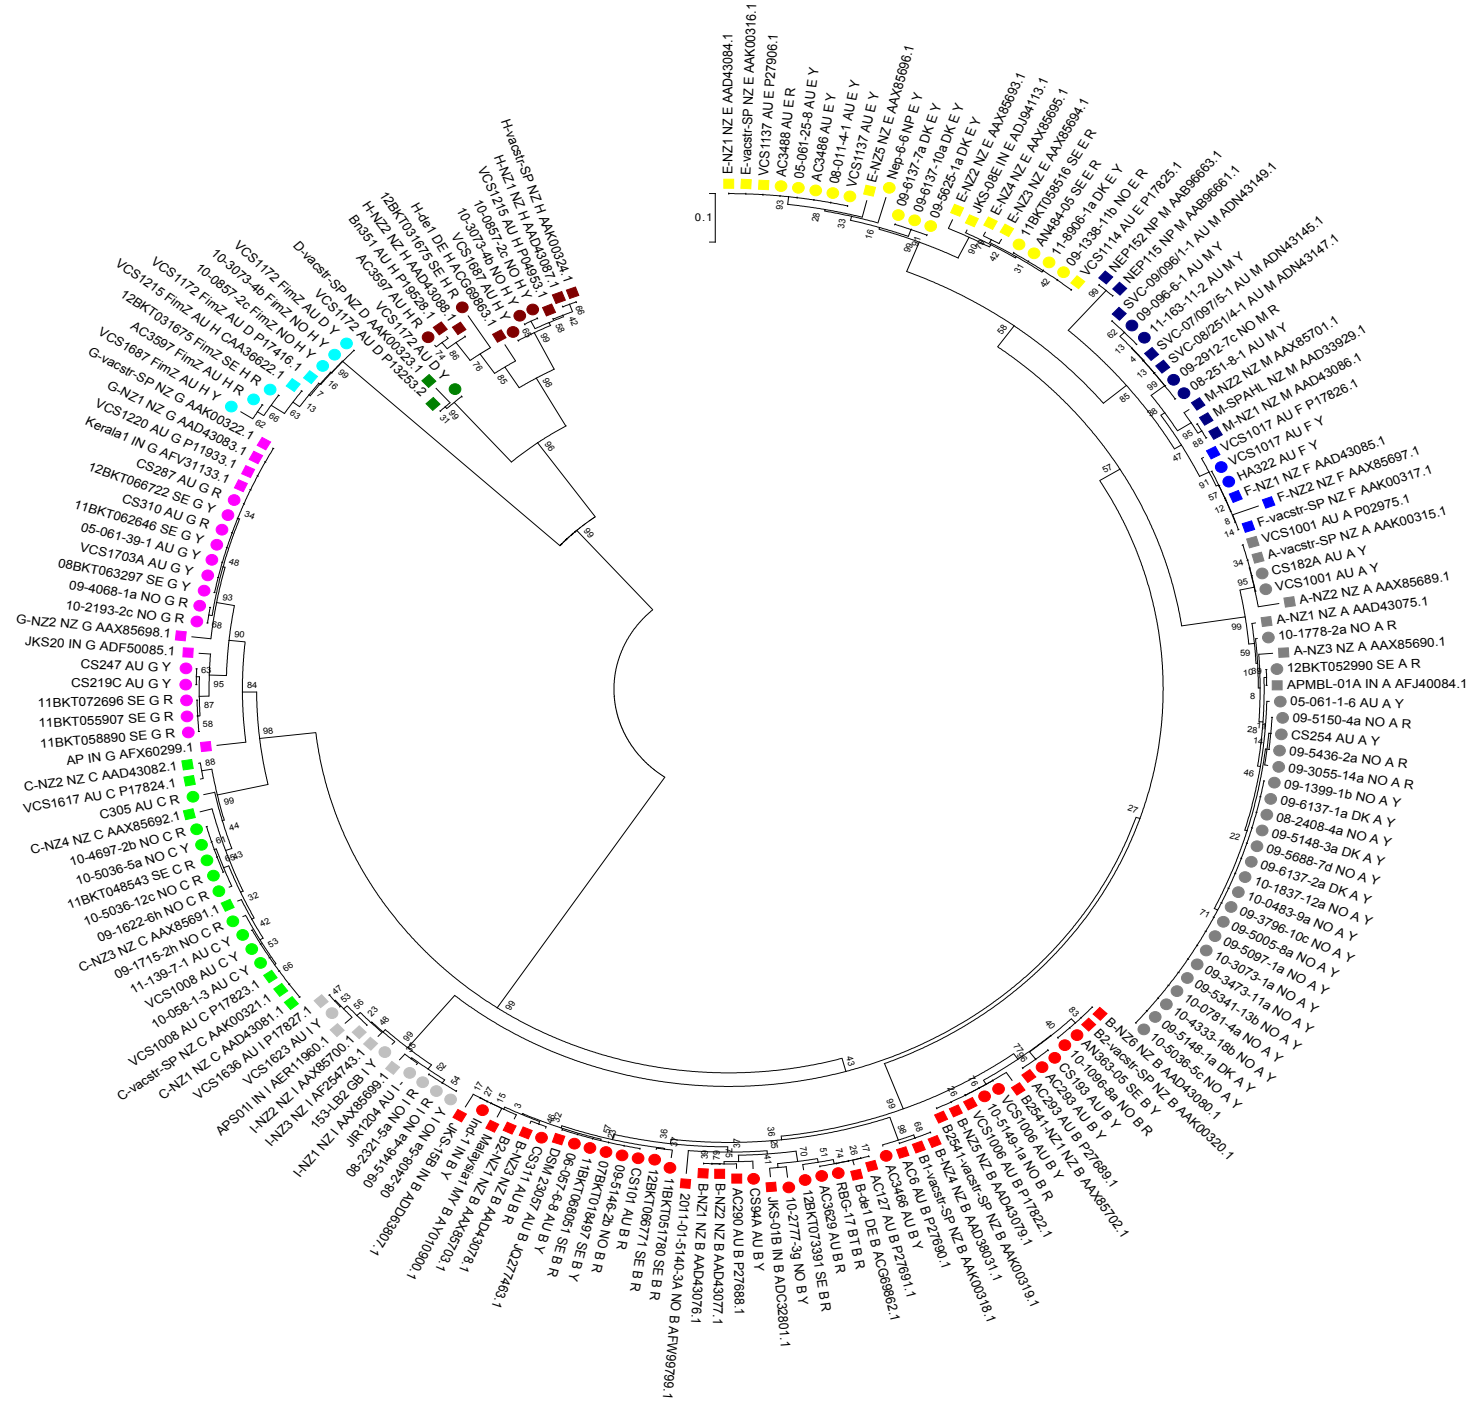

Supplement: mbo005142008sf2.pdf [file mbo005142008sf2.pdf]

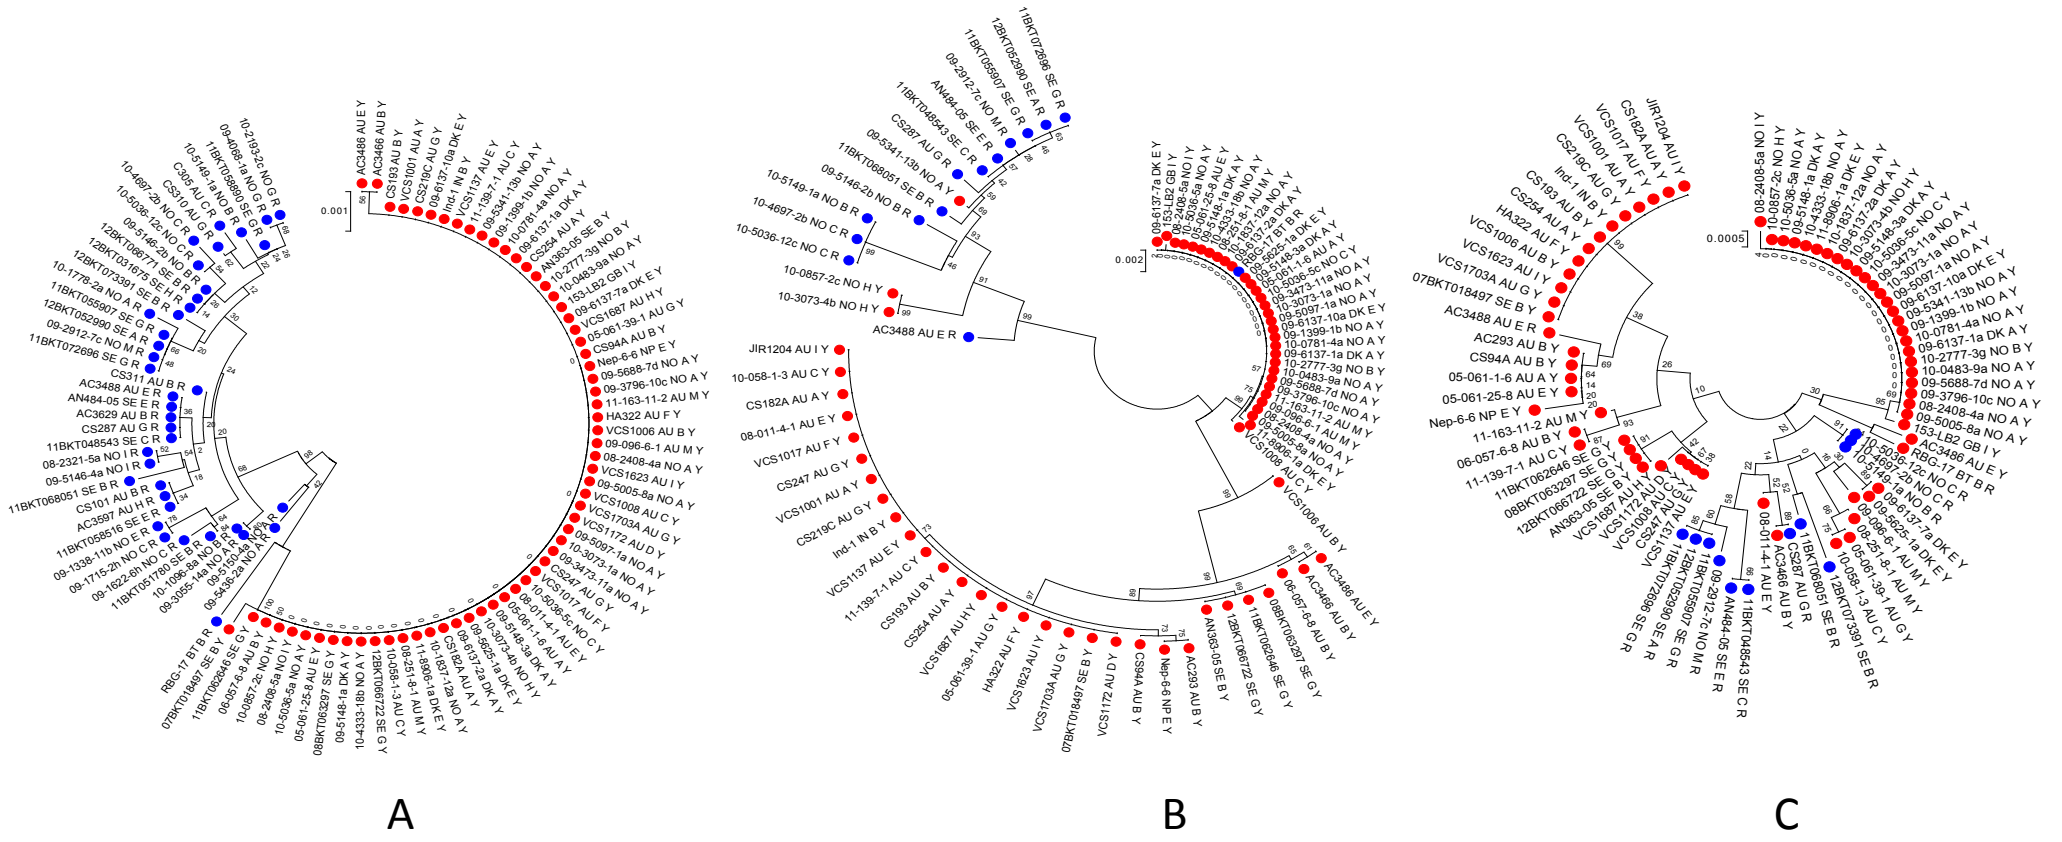

Supplement: mbo005142008sf3.pdf [file mbo005142008sf3.pdf]
